# Supplementary material
Source: HighWire-hosted journal article supplement (https://adc.bmj.com/content/102/3/224)
Supplement: inline-supplementary-material-1 [file inline-supplementary-material-1.pdf]

On-line supplement of the manuscript entitled

**BCG-vaccination at birth and early childhood hospitalisation. A randomised controlled multicenter trial.**

## **Methods, specification of ICD10-codes**

### ***Excluded ICD10 codes***

N=676 diagnostic codes were excluded from the analysis since these diagnoses did not concern somatic, acquired disease; however, all other diagnosis codes during the same hospitalisations periods were retained in the analysis:

- N= 100 Administrative procedures: ICD10 code A including all subgroups
- N=7 Admission of healthy children after birth: ICD10 Z38, V, U, O, Z308
- N=475 Congenital disease: ICD10 Q and birth related perinatal conditions: ICD10 K40, P0, P1, P21, P23, P92
- N=14 Psychiatric disease: ICD10 F
- N=80 Injuries: ICD10 S, T

### ***Included ICD10 codes***

N= 2907 ICD10-codes were included in the analysis:

#### ***Infectious disease***

N=1375 (47.3%) ICD10 codes of infectious disease: ICD10 A, B, G00-G09, H00-H01, H103, H60, H65-H75, H92, I88, J00-J22, J370B, K112, K113, K121, K610, K358, L00-L08, L732, M009, M86, N109, N118B, N129, N30, N390, N499, R827B, P36, DP38-P39, P389E, R50, R560 including all subgroups

#### ***Non-infectious disease other than ICD10 codes of infectious disease***

N=22 (0.1%) ICD10 codes of neoplastic disease: ICD10 C00-D48

N=473 (12.8%) ICD10 codes of organ specific disease: Blood and immune ICD10 D50-D89 n= 14, endocrine E00-E90 n=89, nerve system G00-G99 n=41, eye H00-H59 n=3, ear H60-H95 n=16, circulation I00-I99 n=9, respiration DJ00-DJ99 n=103, gastrointestinal K00-K93 n=147, skin L00-L99 n=21, bone and tissue M00-M99 n=117, urinary and reproductive N00-N99 n=13.

N=162 (8.2%) ICD10 codes of perinatal conditions ICD10 P00-P96

N=350 (15.2%) ICD10 codes of specific symptoms ICD10 R00-R99

N=525 (20.7%) ICD10 codes of observation hospitalisation ICD10 Z00-Z99
